# Supplementary material for: Machine Learning-Assisted Large-Area Preparation of MoS2 Materials
Source: MDPI journal article supplement (doi:10.3390/nano13162283), 2023-08-09
Supplement: s1 [file s1]

# Machine Learning Assisted Large Area Preparation of MoS<sub>2</sub> Materials

Jingting Wang, Mingying Lu, Yongxing Chen, Guolin Hao, Bin Liu, Pinghua Tang, Lian Yu, Lei Wen and Haining Ji\*

**Table S1.** Datasets from literatures and laboratories.

| No. | R(Mo:S) | Flow rate (sccm) | Raction tem-<br>perature (K) | Raction<br>time(min) | Size(μm) |
|-----|---------|------------------|------------------------------|----------------------|----------|
| 1   | 0.020   | 50               | 1071.15                      | 25                   | 40.000   |
| 2   | 0.020   | 50               | 1071.15                      | 10                   | 10.000   |
| 3   | 0.020   | 50               | 1071.15                      | 20                   | 25.000   |
| 4   | 0.020   | 50               | 1046.15                      | 10                   | 20.000   |
| 5   | 1.000   | 25               | 951.15                       | 10                   | 50.000   |
| 6   | 0.020   | 25               | 951.15                       | 5                    | 1.500    |
| 7   | 0.020   | 50               | 1071.15                      | 15                   | 20.000   |
| 8   | 0.020   | 140              | 921.15                       | 15                   | 7.000    |
| 9   | 0.020   | 140              | 971.15                       | 15                   | 16.500   |
| 10  | 0.020   | 140              | 1021.15                      | 15                   | 3.000    |
| 11  | 0.020   | 140              | 971.15                       | 5                    | 5.000    |
| 12  | 0.020   | 140              | 971.15                       | 10                   | 8.000    |
| 13  | 0.020   | 140              | 971.15                       | 20                   | 32.000   |
| 14  | 0.040   | 140              | 971.15                       | 15                   | 7.400    |
| 15  | 0.050   | 140              | 971.15                       | 15                   | 8.900    |
| 16  | 0.060   | 140              | 971.15                       | 15                   | 12.600   |
| 17  | 0.070   | 140              | 971.15                       | 15                   | 18.400   |
| 18  | 0.090   | 140              | 971.15                       | 15                   | 61.000   |
| 19  | 0.15    | 140              | 971.15                       | 15                   | 100.000  |
| 20  | 0.100   | 100              | 1071.15                      | 25                   | 45.000   |
| 21  | 0.100   | 30               | 1071.15                      | 10                   | 50.000   |
| 22  | 0.500   | 70               | 921.15                       | 360                  | 15.000   |
| 23  | 0.500   | 70               | 921.15                       | 240                  | 5.000    |
| 24  | 0.300   | 75               | 1121.15                      | 10                   | 125.000  |
| 25  | 0.333   | 150              | 1021.15                      | 10                   | 40.309   |
| 26  | 0.400   | 100              | 1121.15                      | 15                   | 54.037   |
| 27  | 0.100   | 100              | 1071.15                      | 45                   | 50.313   |
| 28  | 0.333   | 75               | 971.15                       | 25                   | 50.000   |
| 29  | 1.000   | 70               | 1081.15                      | 20                   | 80.000   |
| 30  | 0.500   | 120              | 921.15                       | 180                  | 200.000  |
| 31  | 0.090   | 50               | 1091.15                      | 20                   | 20.000   |
| 32  | 0.060   | 50               | 1091.15                      | 20                   | 40.000   |
| 33  | 0.060   | 50               | 1131.15                      | 20                   | 20.000   |
| 34  | 0.060   | 50               | 1171.15                      | 20                   | 28.573   |
| 35  | 0.090   | 20               | 1091.15                      | 20                   | 30.000   |
| 36  | 0.015   | 200              | 1031.15                      | 20                   | 53.297   |
| 37  | 0.015   | 200              | 1031.15                      | 30                   | 60.000   |
| 38  | 0.015   | 200              | 1001.15                      | 10                   | 25.000   |
| 39  | 0.013   | 200              | 1031.15                      | 10                   | 24.511   |
| 40  | 0.015   | 200              | 1031.15                      | 10                   | 23.000   |
| 41  | 0.016   | 200              | 1031.15                      | 10                   | 54.627   |
| 42  | 0.028   | 200              | 1031.15                      | 10                   | 51.767   |
| 43  | 0.015   | 100              | 1031.15                      | 10                   | 46.521   |

|     |       |      |         |    |         |
|-----|-------|------|---------|----|---------|
| 44  | 0.015 | 150  | 1031.15 | 10 | 45.179  |
| 45  | 0.015 | 200  | 1031.15 | 10 | 11.921  |
| 46  | 0.250 | 20   | 921.15  | 60 | 25.000  |
| 47  | 0.250 | 20   | 921.15  | 40 | 30.000  |
| 48  | 0.250 | 20   | 921.15  | 20 | 60.300  |
| 49  | 0.006 | 60   | 1101.15 | 10 | 47.704  |
| 50  | 0.025 | 150  | 1121.15 | 10 | 146.000 |
| 51  | 0.020 | 100  | 1171.15 | 20 | 77.143  |
| 52  | 0.030 | 100  | 1171.15 | 15 | 161.429 |
| 53  | 0.060 | 75   | 1171.15 | 20 | 89.048  |
| 54  | 0.030 | 100  | 1191.15 | 20 | 15.238  |
| 55  | 0.030 | 100  | 1171.15 | 20 | 167.619 |
| 56  | 0.030 | 100  | 1151.15 | 20 | 50.476  |
| 57  | 0.100 | 100  | 1171.15 | 20 | 37.619  |
| 58  | 0.060 | 100  | 1171.15 | 20 | 42.381  |
| 59  | 0.030 | 100  | 1171.15 | 30 | 200.000 |
| 60  | 0.250 | 100  | 1021.15 | 5  | 46.000  |
| 61  | 0.333 | 100  | 1021.15 | 5  | 15.000  |
| 62  | 0.250 | 80   | 1021.15 | 5  | 45.000  |
| 63  | 0.004 | 50   | 1021.15 | 10 | 25.000  |
| 64  | 0.007 | 50   | 1021.15 | 10 | 6.000   |
| 65  | 0.250 | 100  | 1021.15 | 25 | 32.000  |
| 66  | 0.250 | 100  | 1021.15 | 28 | 68.000  |
| 67  | 0.250 | 100  | 1021.15 | 15 | 7.000   |
| 68  | 0.250 | 30   | 1021.15 | 10 | 12.000  |
| 69  | 0.250 | 60   | 1021.15 | 40 | 105.000 |
| 70  | 0.250 | 100  | 1021.15 | 30 | 72.000  |
| 71  | 0.250 | 150  | 1021.15 | 10 | 6.000   |
| 72  | 0.100 | 1000 | 1121.15 | 60 | 29.232  |
| 73  | 0.100 | 1000 | 1046.15 | 60 | 80.368  |
| 74  | 0.100 | 1000 | 898.15  | 60 | 65.445  |
| 75  | 0.120 | 10   | 906.15  | 30 | 72.687  |
| 76  | 0.128 | 10   | 906.15  | 30 | 31.681  |
| 77  | 0.006 | 10   | 906.15  | 30 | 30.555  |
| 78  | 0.006 | 10   | 1081.15 | 30 | 41.939  |
| 79  | 0.006 | 10   | 1101.15 | 30 | 20.561  |
| 80  | 0.006 | 10   | 1121.15 | 30 | 16.588  |
| 81  | 0.004 | 60   | 1051.15 | 15 | 10.341  |
| 82  | 0.004 | 60   | 1051.15 | 20 | 29.545  |
| 83  | 0.008 | 100  | 981.15  | 10 | 10.000  |
| 84  | 0.008 | 100  | 1001.15 | 10 | 40.000  |
| 85  | 0.004 | 100  | 1021.15 | 10 | 120.769 |
| 86  | 0.008 | 100  | 1021.15 | 10 | 43.077  |
| 87  | 0.005 | 100  | 1021.15 | 10 | 300.000 |
| 88  | 0.006 | 100  | 1121.15 | 5  | 70.000  |
| 89  | 0.006 | 100  | 1111.15 | 5  | 25.000  |
| 90  | 0.006 | 100  | 1101.15 | 5  | 30.000  |
| 91  | 0.006 | 100  | 1091.15 | 5  | 27.549  |
| 92  | 0.006 | 100  | 1081.15 | 5  | 20.000  |
| 93  | 0.006 | 100  | 1071.15 | 5  | 15.000  |
| 94  | 0.006 | 80   | 1071.15 | 15 | 20.000  |
| 95  | 0.006 | 80   | 1071.15 | 20 | 40.000  |
| 96  | 0.006 | 80   | 1071.15 | 30 | 89.869  |
| 97  | 0.006 | 80   | 1071.15 | 25 | 66.177  |
| 98  | 0.667 | 50   | 1121.15 | 15 | 45.000  |
| 99  | 0.667 | 50   | 1021.15 | 3  | 7.000   |
| 100 | 0.667 | 50   | 1071.15 | 3  | 35.000  |
| 101 | 0.667 | 50   | 1121.15 | 30 | 205.333 |
| 102 | 0.667 | 50   | 1171.15 | 3  | 90.333  |

|     |       |     |         |    |         |
|-----|-------|-----|---------|----|---------|
| 103 | 0.667 | 50  | 1221.15 | 3  | 50.000  |
| 104 | 0.020 | 100 | 901.15  | 20 | 10.000  |
| 105 | 0.020 | 100 | 921.15  | 20 | 29.310  |
| 106 | 0.020 | 100 | 971.15  | 20 | 65.086  |
| 107 | 0.020 | 100 | 991.15  | 20 | 90.000  |
| 108 | 0.100 | 100 | 801.15  | 20 | 200.000 |
| 109 | 0.100 | 100 | 1021.15 | 20 | 30.000  |
| 110 | 0.100 | 100 | 951.15  | 20 | 55.000  |
| 111 | 0.100 | 100 | 921.15  | 15 | 76.619  |
| 112 | 0.250 | 100 | 921.15  | 15 | 56.836  |
| 113 | 0.100 | 35  | 1001.15 | 40 | 13.000  |
| 114 | 0.100 | 25  | 1001.15 | 40 | 7.000   |
| 115 | 0.100 | 15  | 1001.15 | 40 | 8.000   |
| 116 | 0.100 | 5   | 1001.15 | 40 | 15.000  |
| 117 | 0.100 | 35  | 1001.15 | 47 | 12.500  |
| 118 | 0.100 | 35  | 1001.15 | 52 | 14.167  |
| 119 | 0.100 | 35  | 1001.15 | 57 | 25.000  |
| 120 | 0.100 | 35  | 1001.15 | 62 | 28.750  |
| 121 | 0.015 | 100 | 971.15  | 15 | 8.000   |
| 122 | 0.018 | 100 | 1021.15 | 15 | 20.000  |
| 123 | 0.015 | 100 | 1071.15 | 15 | 60.000  |
| 124 | 0.015 | 100 | 1071.15 | 5  | 16.204  |
| 125 | 0.015 | 100 | 1071.15 | 30 | 32.555  |
| 126 | 0.015 | 50  | 1071.15 | 15 | 22.785  |
| 127 | 0.25  | 60  | 1071.15 | 10 | 3.000   |
| 128 | 0.150 | 60  | 1171.15 | 10 | 50.000  |
| 129 | 0.200 | 60  | 1171.15 | 10 | 63.541  |
| 130 | 0.027 | 200 | 1021.15 | 10 | 8.333   |
| 131 | 0.027 | 200 | 1021.15 | 15 | 15.238  |
| 132 | 0.050 | 70  | 1271.15 | 10 | 10.000  |
| 133 | 0.050 | 25  | 971.15  | 15 | 80.000  |
| 134 | 0.500 | 200 | 1071.15 | 15 | 28.667  |
| 135 | 0.500 | 200 | 1121.15 | 15 | 37.333  |
| 136 | 0.500 | 200 | 1171.15 | 15 | 24.000  |
| 137 | 0.111 | 50  | 1071.15 | 20 | 37.931  |
| 138 | 0.111 | 50  | 1096.15 | 20 | 53.873  |
| 139 | 0.111 | 50  | 1121.15 | 20 | 40.229  |
| 140 | 0.111 | 50  | 1146.15 | 20 | 36.782  |
| 141 | 0.111 | 50  | 1171.15 | 20 | 34.482  |
| 142 | 0.111 | 75  | 1071.15 | 20 | 81.609  |
| 143 | 0.111 | 75  | 1096.15 | 20 | 68.956  |
| 144 | 0.111 | 75  | 1121.15 | 20 | 56.322  |
| 145 | 0.111 | 75  | 1146.15 | 20 | 45.977  |
| 146 | 0.111 | 75  | 1171.15 | 20 | 19.154  |
| 147 | 0.111 | 100 | 1071.15 | 20 | 37.931  |
| 148 | 0.111 | 100 | 1096.15 | 20 | 72.414  |
| 149 | 0.111 | 100 | 1121.15 | 20 | 21.893  |
| 150 | 0.111 | 100 | 1146.15 | 20 | 34.483  |
| 151 | 0.111 | 100 | 1171.15 | 20 | 18.391  |
| 152 | 0.111 | 75  | 1046.15 | 20 | 35.263  |
| 153 | 0.500 | 20  | 1021.15 | 5  | 16.600  |
| 154 | 0.500 | 20  | 1071.15 | 5  | 15.850  |
| 155 | 0.500 | 20  | 1121.15 | 5  | 16.900  |
| 156 | 0.500 | 20  | 1171.15 | 5  | 16.560  |
| 157 | 0.050 | 100 | 1071.15 | 15 | 20.000  |
| 158 | 0.010 | 100 | 971.15  | 20 | 7.000   |
| 159 | 0.010 | 40  | 971.15  | 20 | 8.250   |
| 160 | 0.010 | 80  | 971.15  | 20 | 20.000  |
| 161 | 0.010 | 240 | 971.15  | 20 | 20.500  |

|     |       |     |         |    |         |
|-----|-------|-----|---------|----|---------|
| 162 | 0.010 | 280 | 971.15  | 20 | 9.250   |
| 163 | 0.250 | 75  | 951.15  | 40 | 8.000   |
| 164 | 0.250 | 75  | 971.15  | 40 | 35.000  |
| 165 | 0.250 | 75  | 1001.15 | 40 | 10.000  |
| 166 | 0.250 | 75  | 1031.15 | 40 | 20.000  |
| 167 | 0.250 | 75  | 1061.15 | 40 | 13.500  |
| 168 | 0.087 | 100 | 921.15  | 10 | 0.500   |
| 169 | 0.087 | 100 | 971.15  | 10 | 1.100   |
| 170 | 0.087 | 100 | 1021.15 | 10 | 2.000   |
| 171 | 0.087 | 100 | 1071.15 | 10 | 3.000   |
| 172 | 0.100 | 100 | 1071.15 | 60 | 50.000  |
| 173 | 0.100 | 100 | 991.15  | 5  | 80.000  |
| 174 | 0.015 | 100 | 921.15  | 15 | 10.000  |
| 175 | 0.015 | 100 | 1021.15 | 15 | 80.000  |
| 176 | 0.015 | 100 | 1021.15 | 5  | 10.000  |
| 177 | 0.015 | 100 | 1021.15 | 10 | 40.000  |
| 178 | 0.015 | 100 | 1021.15 | 20 | 77.000  |
| 179 | 0.015 | 100 | 971.15  | 10 | 5.000   |
| 180 | 0.015 | 100 | 971.15  | 15 | 11.316  |
| 181 | 0.015 | 100 | 921.15  | 10 | 4.298   |
| 182 | 0.015 | 100 | 971.15  | 10 | 20.000  |
| 183 | 0.015 | 100 | 1021.15 | 30 | 80.000  |
| 184 | 0.015 | 100 | 1071.15 | 10 | 40.000  |
| 185 | 0.015 | 100 | 1021.15 | 5  | 5.000   |
| 186 | 0.015 | 100 | 1021.15 | 10 | 20.000  |
| 187 | 0.015 | 100 | 1021.15 | 20 | 40.000  |
| 188 | 0.015 | 100 | 1021.15 | 15 | 36.934  |
| 189 | 0.015 | 100 | 1021.15 | 25 | 60.000  |
| 190 | 0.005 | 100 | 1021.15 | 10 | 20.000  |
| 191 | 0.005 | 100 | 1021.15 | 10 | 30.000  |
| 192 | 0.015 | 100 | 1021.15 | 15 | 34.451. |
| 193 | 0.010 | 100 | 1021.15 | 15 | 10.000  |
| 194 | 0.005 | 100 | 1021.15 | 15 | 11.500  |
| 195 | 0.015 | 100 | 1021.15 | 12 | 27.000  |
| 196 | 0.015 | 100 | 1221.15 | 15 | 40.000  |
| 197 | 0.010 | 175 | 1271.15 | 15 | 48.235  |
| 198 | 0.010 | 150 | 1271.15 | 15 | 45.882  |
| 199 | 0.010 | 125 | 1271.15 | 15 | 28.353  |
| 200 | 0.010 | 100 | 1271.15 | 15 | 22.835  |
